# Supplementary material
Source: PubMed Central journal article supplement (PMC166929)
Supplement: plntphys_131_4_1737__1.pdf [file plntphys_131_4_1737__1.pdf]

*AtTIM17-2* MGTPEEISREPE CPDRILDDDIG GAFMGAVGGGG SAHFHFKGLTY NSSPESSRFVVG GTQSLV 55  
*AtTIM17-1* MGTPEEISREPE CPDRILDDDIG GAFMGAVGGGG SAHFHFKGLTY NSSPESSRFVVG GTQSLV 55  
*AtTIM17-3* MDTKKKSRREH GLYRTVNAIC YAFGAGAVGGGG SVYHFKGLTY NSSPESSRFVVG GTQSLV 55  
*ScTIM17* -MSADHSRDEP CFTVLLNDFG GAFMGAVGGGG VVWHGFKGLTY NSSPESSRFVVG AMSAII 54

*AtTIM17-2* SMNAPRALGGS FAVWGGLFST FDCATMVLVLRQ KEDPWNSIIA GAATGGFLSM RQCAG 110  
*AtTIM17-1* RMSGPRSGGS FSVWGGLYST FDCALVYARRK KEDPWNSIIS GAATGGFLSL RQCGLG 110  
*AtTIM17-3* SMNAPRLGGT FAVWGGLLST FDYALVRII KEDPWNSIVA GAATGGVLSI RRCGVV 110  
*ScTIM17* KARAPVLLGN FGVWGGLFST FDCAVKAVR REDPWNAIIA GFFFGGALLAV RCGVWR 109

*AtTIM17-2* AASRSPTLFGG VLLALIE.GA GIMLNKVLAQ PQN.MMMEDP GMQGMFGMQG MQGMP 163  
*AtTIM17-1* ASARSAALVGG VLLAMIE.GV GIMLNKVQST AHNEQFMEDH AAFSE... .. 155  
*AtTIM17-3* AASASAVMFG FFLAVLNPPF GSK... .. QAKPMAPPIE EAPSSQPLQA ... .. 133  
*ScTIM17* HTRNSSTTCA CLLVVIE.GV GIMFQRYAA QAKPMAPPIE EAPSSQPLQA ... .. 158

*AtTIM17-2* GMPGHQGMFG MQGHMCMHQ SAQIRSESO NQNTASSSSSS SSWFSGCLFDK KKEEV 218  
*AtTIM17-1* ... .. YCMQGIS GSAQIRSESO PETSASSSSSS VSEFSGCLFDK KKEET 193  
*AtTIM17-3* ... .. ... .. GSAQIRSESO PETSASSSSSS VSEFSGCLFDK KKEET 133  
*ScTIM17* ... .. ... .. ... .. ... .. ... .. ... .. ... .. 158

*AtTIM17-2* HPGSESEKTEV LESFDAPPVP SEFVK\*243  
*AtTIM17-1* DHHSSESRTHI LESFDAPPVP TYEFK-218  
*AtTIM17-3* ... .. ... .. ... .. ... .. ... .. ... .. ... .. 133  
*ScTIM17* ... .. ... .. ... .. ... .. ... .. ... .. ... .. 158

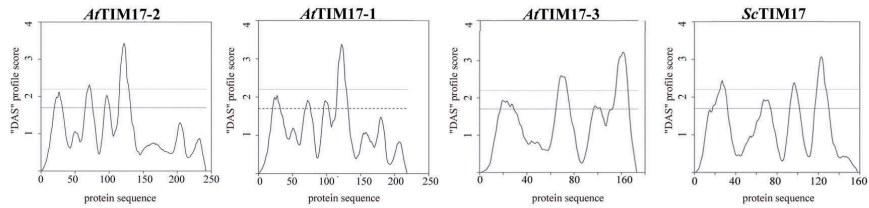

*AtTIM23-1* ... .. MA.. INR..SSDHE SDENT 15  
*AtTIM23-2* ... .. MA.. ANN..RSDHG SDENT 15  
*AtTIM23-3* ... .. MMDP MNH..STGHO QQQKY 17  
*ScTIM23* MSWLFGDKTP TDDANAAVGG QDTTKPKEL LKQSLGFEPN IINNTIIGPFG MHVDN 55

*AtTIM23-1* RLYHPYQNYQ VPIKSOYLY KLPTSPPELF TEEELKORRS WGENLTFYTG TGYLA 69  
*AtTIM23-2* RLYNPNYQNYE VPHKSOYLY KLPTSPPELF TEEELKORRS WGENLTFYTG TGYLA 70  
*AtTIM23-3* RLYNPNYQVNL LPIRKL..LY ELPSPPELF EEEAMKRLT WGENLTFYTG WYCT 69  
*ScTIM23* ARLHPLAGLD KGM...EYLD LEEEQLSSEF GSQGLIFSRG MTDDELGYGT AVYLL 107

*AtTIM23-1* GSVACASAGI FSGIKSFENGD DTKCLKINRI LNSSGQAGRT WGNRVGIVGLI YVAGI 124  
*AtTIM23-2* GSVAGAVGVV ITGIVKSFBSGD DTCLKIKINRI LNSSGQAGRT WGNRVGIVGLI YVAGI 125  
*AtTIM23-3* GSVLIGAFKGT IAGGHRAAIRSG ECLKERTNRI LNSSGQLVDRR GGNLCLGSVGLI MAAAM 124  
*ScTIM23* GLGIGGFSGM MQGGLQANIPFN SPGKLLQINLV LNHIKRGFF LGNNAAGILAL SNIIT 162

*AtTIM23-1* ESGVVAVTDK DDVWTSVVA GLGTGAVERRA ARGVRSAAVA GAFEGCHAAACA VV... 175  
*AtTIM23-2* ESGIVVATDF DDVWTSVVA GLGTGAVERRA ARGVRSAAVA GAFEGCHAAACA VV... 176  
*AtTIM23-3* ESGVTVYHDD DDGSSVTVTA GLGTGAVERRA ASGFRSAAVA GAVEGGVAALAA AV... 176  
*ScTIM23* NSTIDALRKG HDTA.GSITGA CALTGALFKS SKGLKPMGY S SAM..VAACA AVWCS 214

*AtTIM23-1* AGRKQVFRRYA HI187  
*AtTIM23-2* AGRKQIVRYV PI188  
*AtTIM23-3* AGRRIVKREYV PI188  
*ScTIM23* VKKRLLEK... .. -222

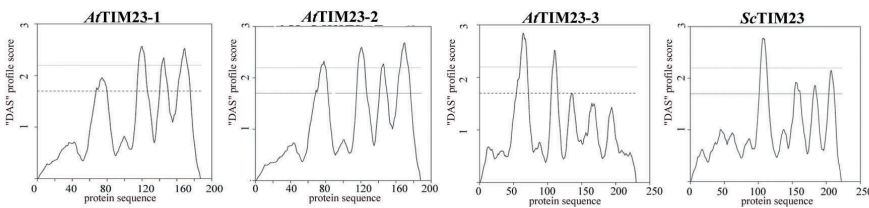

Supp Fig 1
